# Supplementary material for: In pursuit of synergy: An investigation of the PI3K/mTOR/MEK co-targeted inhibition strategy in NSCLC
Source: PubMed Central journal article supplement (PMC5346733; doi:10.18632/oncotarget.12755), 2016-10-19
Supplement: oncotarget-07-79526-s001.pdf [file oncotarget-07-79526-s001.pdf]

# In pursuit of synergy: An investigation of the PI3K/mTOR/MEK co-targeted inhibition strategy in NSCLC

## SUPPLEMENTARY FIGURES AND TABLE

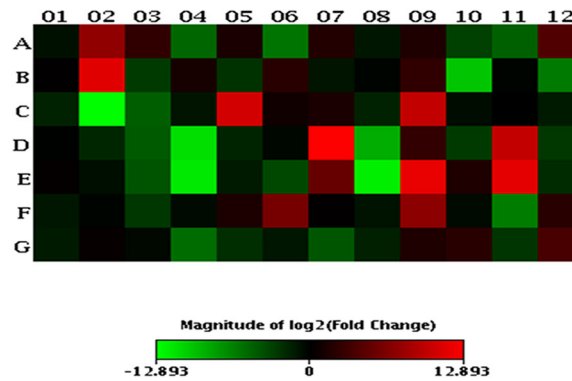

| Layout   | 01                             | 02                              | 03                               | 04                              | 05                             | 06                              | 07                             | 08                             | 09                            | 10                             | 11                              | 12                             |
|----------|--------------------------------|---------------------------------|----------------------------------|---------------------------------|--------------------------------|---------------------------------|--------------------------------|--------------------------------|-------------------------------|--------------------------------|---------------------------------|--------------------------------|
| <b>A</b> | Akt1<br><b>-1.74</b><br>OKAY   | Akt1s1<br><b>165.10</b><br>A    | Akt2<br><b>5.42</b><br>OKAY      | Akt3<br><b>-36.56</b><br>OKAY   | Cab39<br><b>2.40</b><br>OKAY   | Cab39l<br><b>-57.08</b><br>OKAY | Cdc42<br><b>3.24</b><br>OKAY   | Chuk<br><b>-2.15</b><br>OKAY   | Ddit4<br><b>2.89</b><br>OKAY  | Ddit4l<br><b>-9.14</b><br>OKAY | Deptor<br><b>-28.38</b><br>OKAY | Eif4b<br><b>16.99</b><br>OKAY  |
| <b>B</b> | Eif4e<br><b>1.07</b><br>OKAY   | Eif4ebp1<br><b>2706.94</b><br>A | Eif4ebp2<br><b>-7.73</b><br>OKAY | Fkbp1a<br><b>2.16</b><br>OKAY   | Fkbp8<br><b>-5.83</b><br>OKAY  | Gsk3b<br><b>3.93</b><br>OKAY    | Hif1a<br><b>-2.02</b><br>OKAY  | Hras1<br><b>-1.12</b><br>OKAY  | Hspa4<br><b>5.44</b><br>OKAY  | Igf1<br><b>-1007.08</b><br>A   | Igfbp3<br><b>-1.16</b><br>OKAY  | Ikbkb<br><b>-73.96</b><br>OKAY |
| <b>C</b> | Ilk<br><b>-3.27</b><br>OKAY    | Ins2<br><b>-7215.66</b><br>A    | Insr<br><b>-26.92</b><br>OKAY    | Irs1<br><b>-2.05</b><br>OKAY    | Mapk1<br><b>1717.71</b><br>A   | Mapk3<br><b>1.80</b><br>OKAY    | Mapkap1<br><b>2.41</b><br>OKAY | Mlst8<br><b>-3.21</b><br>OKAY  | Mtor<br><b>951.67</b><br>A    | Myo1c<br><b>-1.55</b><br>OKAY  | Pdpc1<br><b>1.01</b><br>OKAY    | Pik3c3<br><b>-2.46</b><br>OKAY |
| <b>D</b> | Pik3ca<br><b>-1.04</b><br>OKAY | Pik3cb<br><b>-3.91</b><br>OKAY  | Pik3cd<br><b>-23.61</b><br>OKAY  | Pik3cg<br><b>-2536.82</b><br>A  | Pld1<br><b>-3.63</b><br>OKAY   | Pld2<br><b>-1.26</b><br>OKAY    | Ppp2ca<br><b>7606.65</b><br>A  | Ppp2r2b<br><b>-451.23</b><br>A | Ppp2r4<br><b>5.93</b><br>OKAY | Prkaa1<br><b>-7.40</b><br>OKAY | Prkaa2<br><b>984.27</b><br>A    | Prkab1<br><b>-7.10</b><br>OKAY |
| <b>E</b> | Prkab2<br><b>1.15</b><br>OKAY  | Prkag1<br><b>-1.69</b><br>OKAY  | Prkag2<br><b>-19.66</b><br>OKAY  | Prkag3<br><b>-3564.03</b><br>A  | Prkca<br><b>-2.56</b><br>OKAY  | Prkcb<br><b>-12.16</b><br>OKAY  | Prkcg<br><b>34.90</b><br>A     | Prkce<br><b>-4565.00</b><br>A  | Pten<br><b>3634.11</b><br>A   | Rheb<br><b>2.82</b><br>OKAY    | Rhoa<br><b>3078.48</b><br>A     | Rictor<br><b>-4.30</b><br>OKAY |
| <b>F</b> | Rps6<br><b>-2.10</b><br>OKAY   | Rps6ka1<br><b>-1.17</b><br>OKAY | Rps6ka2<br><b>-6.50</b><br>OKAY  | Rps6ka5<br><b>-1.39</b><br>OKAY | Rps6kb1<br><b>2.70</b><br>OKAY | Rps6kb2<br><b>63.40</b><br>A    | Rptor<br><b>1.04</b><br>OKAY   | Rraga<br><b>-1.94</b><br>OKAY  | Rragb<br><b>140.59</b><br>A   | Rragc<br><b>-1.46</b><br>OKAY  | Rragd<br><b>-77.26</b><br>OKAY  | Sgk1<br><b>4.10</b><br>OKAY    |
| <b>G</b> | Stk11<br><b>-2.42</b><br>OKAY  | Stradb<br><b>1.20</b><br>OKAY   | Telo2<br><b>-1.29</b><br>OKAY    | Trp53<br><b>-43.42</b><br>OKAY  | Tsc1<br><b>-4.86</b><br>OKAY   | Tsc2<br><b>-2.15</b><br>OKAY    | Ulk1<br><b>-20.97</b><br>OKAY  | Ulk2<br><b>-3.06</b><br>OKAY   | Vegfa<br><b>2.93</b><br>OKAY  | Vegfb<br><b>4.02</b><br>OKAY   | Vegfc<br><b>-6.22</b><br>OKAY   | Ywhaq<br><b>12.32</b><br>OKAY  |

**Supplementary Figure S1: mTOR pathway mRNA up/down-regulation in H460 cells compared to and A549s.** RNA was extracted from H460 and A549 cells. cDNA was synthesized, which was then added to mTOR pathway RT<sup>2</sup> Profiler Arrays. H460 gene expression was compared to A549 gene expression. A heat map was constructed using SABiosciences online software, with fold changes shown below, where ‘A’ refers to genes which amplified late (>30 cycles) in either sample, ‘B’ refers to genes which amplified late (>30 cycles) in both samples, and ‘C’ refers to samples where no expression was detected in either sample. 27 genes were upregulated >2 fold and 39 genes were downregulated >2 fold) in H460 cells compared with A549 cells.

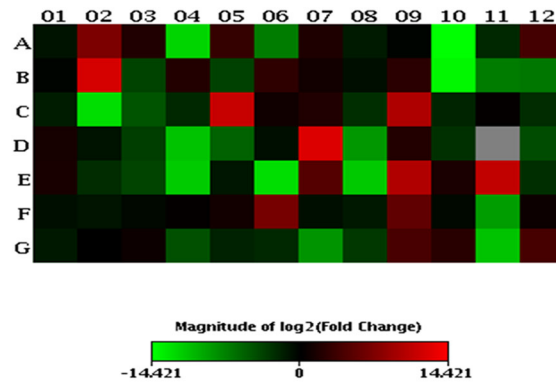

| Layout   | 01                     | 02                       | 03                         | 04                      | 05                      | 06                        | 07                      | 08                      | 09                     | 10                       | 11                        | 12                       |
|----------|------------------------|--------------------------|----------------------------|-------------------------|-------------------------|---------------------------|-------------------------|-------------------------|------------------------|--------------------------|---------------------------|--------------------------|
| <b>A</b> | Akt1<br>-2.03<br>OKAY  | Akt1s1<br>130.99<br>A    | Akt2<br>3.48<br>OKAY       | Akt3<br>-4396.99<br>A   | Cab39<br>7.96<br>OKAY   | Cab39l<br>-124.22<br>OKAY | Cdc42<br>3.22<br>OKAY   | Chuk<br>-2.69<br>OKAY   | Ddit4<br>-1.13<br>OKAY | Ddit4l<br>-21929.11<br>A | Deptor<br>-4.72<br>OKAY   | Eif4b<br>14.73<br>OKAY   |
| <b>B</b> | Eif4e<br>-1.21<br>OKAY | Eif4ebp1<br>4548.62<br>A | Eif4ebp2<br>-12.88<br>OKAY | Fkbp1a<br>3.91<br>OKAY  | Fkbp8<br>-12.14<br>OKAY | Gsk3b<br>6.12<br>OKAY     | Hif1a<br>2.07<br>OKAY   | Hras1<br>-1.68<br>OKAY  | Hspa4<br>5.29<br>OKAY  | Igf1<br>-16289.27<br>A   | Igfbp3<br>-126.95<br>OKAY | Ikbkb<br>-111.27<br>OKAY |
| <b>C</b> | Ilk<br>-3.11<br>OKAY   | Ins2<br>-6120.15<br>A    | Insr<br>-27.85<br>OKAY     | Irs1<br>-4.71<br>OKAY   | Mapk1<br>2447.82<br>A   | Mapk3<br>1.82<br>OKAY     | Mapkap1<br>3.56<br>OKAY | Mlst8<br>-5.85<br>OKAY  | Mtor<br>1015.72<br>A   | Myo1c<br>-4.23<br>OKAY   | Pdpk1<br>1.21<br>OKAY     | Pik3c3<br>-5.41<br>OKAY  |
| <b>D</b> | Pik3ca<br>2.33<br>OKAY | Pik3cb<br>-2.07<br>OKAY  | Pik3cd<br>-11.48<br>OKAY   | Pik3cg<br>-2151.67<br>A | Pld1<br>-45.77<br>OKAY  | Pld2<br>-1.77<br>OKAY     | Ppp2ca<br>5895.18<br>A  | Ppp2r2b<br>-382.72<br>A | Ppp2r4<br>3.85<br>OKAY | Prkaa1<br>-6.59<br>OKAY  | Prkaa2<br>-2.60<br>C      | Prkab1<br>-19.54<br>OKAY |
| <b>E</b> | Prkab2<br>2.58<br>OKAY | Prkag1<br>-5.82<br>OKAY  | Prkag2<br>-14.47<br>OKAY   | Prkag3<br>-3022.93<br>A | Prkce<br>-2.36<br>OKAY  | Prkcb<br>-5913.82<br>A    | Prkcg<br>27.31<br>A     | Prkce<br>-2757.04<br>A  | Pten<br>1055.37<br>A   | Rheb<br>2.85<br>OKAY     | Rhoa<br>2040.93<br>A      | Rictor<br>-5.98<br>OKAY  |
| <b>F</b> | Rps6<br>-1.69<br>OKAY  | Rps6ka1<br>-2.26<br>OKAY | Rps6ka2<br>-1.36<br>OKAY   | Rps6ka5<br>1.18<br>OKAY | Rps6kb1<br>1.98<br>OKAY | Rps6kb2<br>98.95<br>A     | Rptor<br>-1.79<br>OKAY  | Rraga<br>-2.50<br>OKAY  | Rragb<br>43.38<br>A    | Rragc<br>-1.37<br>OKAY   | Rragd<br>-500.88<br>A     | Sgk1<br>1.63<br>OKAY     |
| <b>G</b> | Stk11<br>-2.53<br>OKAY | Stradb<br>-1.04<br>OKAY  | Telo2<br>1.56<br>OKAY      | Trp53<br>-23.51<br>OKAY | Tsc1<br>-3.91<br>OKAY   | Tsc2<br>-4.88<br>OKAY     | Ulk1<br>-358.85<br>OKAY | Ulk2<br>-8.76<br>OKAY   | Vegfa<br>16.27<br>OKAY | Vegfb<br>4.89<br>OKAY    | Vegfc<br>-2130.25<br>A    | Ywhaq<br>15.31<br>OKAY   |

**Supplementary Figure S2: mTOR pathway mRNA up/down-regulation in H1975 cells compared to and A549 cells.** RNA was extracted from H1975 and A549 cells. cDNA was synthesized, which was then added to mTOR pathway RT<sup>2</sup> Profiler Arrays. H1975 gene expression was compared to A549 gene expression. A heat map was constructed using SABiosciences online software, with fold changes shown below, where ‘A’ refers to genes which amplified late (>30 cycles) in either sample, ‘B’ refers to genes which amplified late (>30 cycles) in both samples, and ‘C’ refers to samples where no expression was detected in either sample. 26 genes were upregulated >2 fold and 41 genes were downregulated >2 fold in H1975 cells compared with A549 cells.

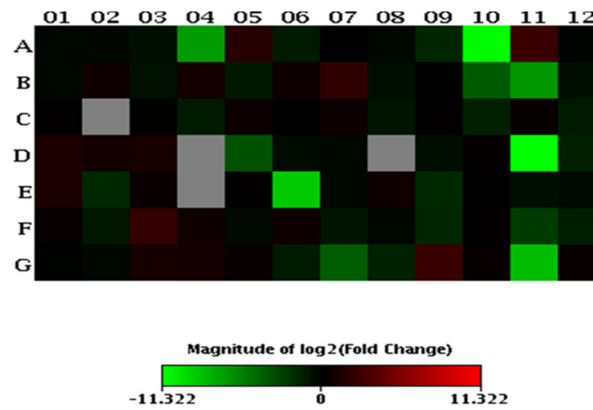

| Layout   | 01                            | 02                              | 03                               | 04                             | 05                              | 06                             | 07                             | 08                            | 09                             | 10                             | 11                               | 12                             |
|----------|-------------------------------|---------------------------------|----------------------------------|--------------------------------|---------------------------------|--------------------------------|--------------------------------|-------------------------------|--------------------------------|--------------------------------|----------------------------------|--------------------------------|
| <b>A</b> | Akt1<br><b>-1.17</b><br>OKAY  | Akt1s1<br><b>-1.26</b><br>OKAY  | Akt2<br><b>-1.56</b><br>OKAY     | Akt3<br><b>-120.27</b><br>A    | Cab39<br><b>3.31</b><br>OKAY    | Cab39l<br><b>-2.18</b><br>OKAY | Cdc42<br><b>-1.01</b><br>OKAY  | Chuk<br><b>-1.25</b><br>OKAY  | Ddit4<br><b>-3.26</b><br>OKAY  | Ddit4l<br><b>-2399.85</b><br>A | Deptor<br><b>6.01</b><br>OKAY    | Eif4b<br><b>-1.15</b><br>OKAY  |
| <b>B</b> | Eif4e<br><b>-1.29</b><br>OKAY | Eif4ebp1<br><b>1.68</b><br>OKAY | Eif4ebp2<br><b>-1.67</b><br>OKAY | Fkbp1a<br><b>1.81</b><br>OKAY  | Fkbp8<br><b>-2.08</b><br>OKAY   | Gsk3b<br><b>1.56</b><br>OKAY   | Hif1a<br><b>4.17</b><br>OKAY   | Hras1<br><b>-1.51</b><br>OKAY | Hspa4<br><b>-1.03</b><br>OKAY  | Igf1<br><b>-16.17</b><br>B     | Igfbp3<br><b>-109.24</b><br>OKAY | Ikbkb<br><b>-1.50</b><br>OKAY  |
| <b>C</b> | Ilk<br><b>1.05</b><br>OKAY    | Ins2<br><b>1.18</b><br>C        | Insr<br><b>-1.03</b><br>OKAY     | Irs1<br><b>-2.29</b><br>OKAY   | Mapk1<br><b>1.43</b><br>OKAY    | Mapk3<br><b>1.01</b><br>OKAY   | Mapkap1<br><b>1.48</b><br>OKAY | Mlst8<br><b>-1.83</b><br>OKAY | Mtor<br><b>1.07</b><br>OKAY    | Myo1c<br><b>-2.73</b><br>OKAY  | Pdpk1<br><b>1.20</b><br>OKAY     | Pik3c3<br><b>-2.20</b><br>OKAY |
| <b>D</b> | Pik3ca<br><b>2.44</b><br>OKAY | Pik3cb<br><b>1.89</b><br>OKAY   | Pik3cd<br><b>2.06</b><br>OKAY    | Pik3cg<br><b>1.18</b><br>C     | Pld1<br><b>-12.61</b><br>OKAY   | Pld2<br><b>-1.41</b><br>OKAY   | Ppp2ca<br><b>-1.29</b><br>OKAY | Ppp2r2b<br><b>1.18</b><br>C   | Ppp2r4<br><b>-1.54</b><br>OKAY | Prkaa1<br><b>1.12</b><br>OKAY  | Prkaa2<br><b>-2560.61</b><br>A   | Prkab1<br><b>-2.75</b><br>OKAY |
| <b>E</b> | Prkab2<br><b>2.24</b><br>OKAY | Prkag1<br><b>-3.45</b><br>OKAY  | Prkag2<br><b>1.36</b><br>OKAY    | Prkag3<br><b>1.18</b><br>C     | Prkca<br><b>1.08</b><br>OKAY    | Prkcb<br><b>-486.53</b><br>A   | Prkcg<br><b>-1.28</b><br>OKAY  | Prkce<br><b>1.66</b><br>B     | Pten<br><b>-3.44</b><br>OKAY   | Rheb<br><b>1.01</b><br>OKAY    | Rhoa<br><b>-1.51</b><br>OKAY     | Rictor<br><b>-1.39</b><br>OKAY |
| <b>F</b> | Rps6<br><b>1.24</b><br>OKAY   | Rps6ka1<br><b>-1.93</b><br>OKAY | Rps6ka2<br><b>4.78</b><br>OKAY   | Rps6ka5<br><b>1.64</b><br>OKAY | Rps6kb1<br><b>-1.37</b><br>OKAY | Rps6kb2<br><b>1.56</b><br>OKAY | Rptor<br><b>-1.86</b><br>OKAY  | Rraga<br><b>-1.29</b><br>OKAY | Rragb<br><b>-3.24</b><br>OKAY  | Rragc<br><b>1.07</b><br>OKAY   | Rragd<br><b>-6.48</b><br>A       | Sgk1<br><b>-2.51</b><br>OKAY   |
| <b>G</b> | Stk11<br><b>-1.05</b><br>OKAY | Stradb<br><b>-1.25</b><br>OKAY  | Telo2<br><b>2.02</b><br>OKAY     | Trp53<br><b>1.85</b><br>OKAY   | Tsc1<br><b>1.24</b><br>OKAY     | Tsc2<br><b>-2.27</b><br>OKAY   | Ulk1<br><b>-17.11</b><br>OKAY  | Ulk2<br><b>-2.86</b><br>OKAY  | Vegfa<br><b>5.56</b><br>OKAY   | Vegfb<br><b>1.22</b><br>OKAY   | Vegfc<br><b>-342.61</b><br>A     | Ywhaq<br><b>1.24</b><br>OKAY   |

**Supplementary Figure S3: mTOR pathway mRNA up/down-regulation in H1975 cells compared to and H460 cells.** RNA was extracted from H1975 and H460 cells. cDNA was synthesized, which was then added to mTOR pathway RT<sup>2</sup> Profiler Arrays. H1975 gene expression was compared to H460 gene expression. A heat map was constructed using SABiosciences online software, with fold changes shown below, where ‘A’ refers to genes which amplified late (>30 cycles) in either sample, ‘B’ refers to genes which amplified late (>30 cycles) in both samples, and ‘C’ refers to samples where no expression was detected in either sample. 9 genes were upregulated > 2 fold and 23 genes were downregulated in H1975 cells compared with H460 cells.

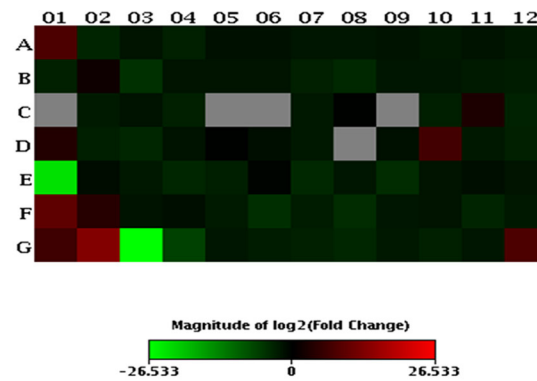

| Layout   | 01                          | 02                      | 03                           | 04                        | 05                     | 06                      | 07                      | 08                      | 09                     | 10                      | 11                      | 12                      |
|----------|-----------------------------|-------------------------|------------------------------|---------------------------|------------------------|-------------------------|-------------------------|-------------------------|------------------------|-------------------------|-------------------------|-------------------------|
| <b>A</b> | ABCB1<br>250.43<br>A        | ABCC1<br>-13.71<br>OKAY | ABCC2<br>-4.42<br>OKAY       | ABCC3<br>-9.53<br>OKAY    | ABCC5<br>-3.29<br>OKAY | ABCG2<br>-2.99<br>OKAY  | AHR<br>-5.12<br>OKAY    | AP1S1<br>-4.66<br>OKAY  | APC<br>-3.62<br>OKAY   | AR<br>-5.42<br>OKAY     | ARNT<br>-3.60<br>OKAY   | ATM<br>-5.40<br>OKAY    |
| <b>B</b> | BAX<br>-9.59<br>OKAY        | BCL2<br>2.71<br>OKAY    | BCL2L1<br>-30.74<br>OKAY     | BLMH<br>-4.37<br>OKAY     | BRCA1<br>-4.45<br>OKAY | BRCA2<br>-4.22<br>OKAY  | CCND1<br>-9.59<br>OKAY  | CCNE1<br>-16.98<br>OKAY | CDK2<br>-4.75<br>OKAY  | CDK4<br>-4.72<br>OKAY   | CDKN1A<br>-6.90<br>OKAY | CDKN1B<br>-7.24<br>OKAY |
| <b>C</b> | CDKN2A<br>-3.15<br>C        | CDKN2D<br>-6.79<br>OKAY | CLPTM1L<br>-3.49<br>OKAY     | CYP1A1<br>-10.40<br>A     | CYP1A2<br>-3.15<br>C   | CYP2B6<br>-3.15<br>C    | CYP2C19<br>-5.38<br>B   | CYP2C8<br>-1.08<br>B    | CYP2C9<br>-3.15<br>C   | CYP2D6<br>-8.62<br>OKAY | CYP2E1<br>7.26<br>A     | CYP3A4<br>-11.60<br>B   |
| <b>D</b> | CYP3A5<br>12.36<br>A        | DHFR<br>-8.97<br>OKAY   | EGFR<br>-16.57<br>OKAY       | ELK1<br>-3.58<br>OKAY     | EPHX1<br>-1.22<br>OKAY | ERBB2<br>-2.86<br>OKAY  | ERBB3<br>-5.27<br>A     | ERBB4<br>-3.15<br>C     | ERCC3<br>-3.19<br>OKAY | ESR1<br>122.26<br>A     | ESR2<br>-5.98<br>B      | FGF2<br>-9.46<br>OKAY   |
| <b>E</b> | FOS<br>-12345286.65<br>OKAY | GSK3A<br>-2.50<br>OKAY  | GSTP1<br>-5.48<br>OKAY       | HIF1A<br>-15.68<br>OKAY   | IGF1R<br>-8.90<br>OKAY | IGF2R<br>-1.36<br>OKAY  | MET<br>-18.83<br>OKAY   | MSH2<br>-5.18<br>OKAY   | MVP<br>-23.78<br>OKAY  | MYC<br>-4.01<br>OKAY    | NAT2<br>-2.76<br>A      | NFKB1<br>-4.47<br>OKAY  |
| <b>F</b> | NFKB2<br>865.93<br>A        | NFKBIB<br>14.96<br>A    | NFKBIE<br>-3.90<br>OKAY      | PPARA<br>-2.87<br>OKAY    | PPARD<br>-6.74<br>OKAY | PPARG<br>-26.55<br>OKAY | RARA<br>-7.80<br>OKAY   | RARB<br>-25.22<br>OKAY  | RARG<br>-5.08<br>OKAY  | RB1<br>-4.49<br>OKAY    | RELB<br>-12.72<br>OKAY  | RXRA<br>-5.26<br>OKAY   |
| <b>G</b> | RXRB<br>89.25<br>A          | SOD1<br>14609.22<br>A   | SULT1E1<br>-97118311.28<br>A | TNFRSF11A<br>-102.30<br>A | TOP1<br>-4.56<br>OKAY  | TOP2A<br>-7.87<br>OKAY  | TOP2B<br>-10.02<br>OKAY | TP53<br>-14.59<br>OKAY  | TPMT<br>-5.55<br>OKAY  | UGCG<br>-10.74<br>OKAY  | XPA<br>-5.20<br>OKAY    | XPC<br>245.80<br>OKAY   |

**Supplementary Figure S4: Cancer drug resistance mRNA up/down-regulation in H460 cells compared to A549 cells.** RNA was extracted from H460 and A549 cells. cDNA was synthesized, which was then added to cancer drug resistance RT<sup>2</sup> Profiler Arrays. H460 gene expression was compared to A549 gene expression. A heat map was constructed using SABiosciences online software, with fold changes shown below, where ‘A’ refers to genes which amplified late (>30 cycles) in either sample, ‘B’ refers to genes which amplified late (>30 cycles) in both samples, and ‘C’ refers to samples where no expression was detected in either sample. 9 genes were upregulated > 2 fold and 65 genes were downregulated > 2 fold in H460 cells compared with A549 cells.

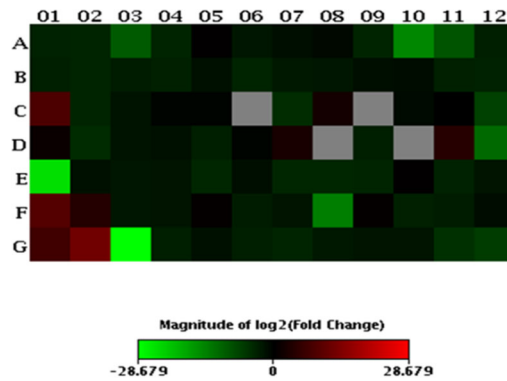

| Layout   | 01                  | 02               | 03                       | 04                 | 05              | 06               | 07                | 08                | 09               | 10              | 11               | 12                |
|----------|---------------------|------------------|--------------------------|--------------------|-----------------|------------------|-------------------|-------------------|------------------|-----------------|------------------|-------------------|
| <b>A</b> | ABCB1<br>-14.11     | ABCC1<br>-17.49  | ABCC2<br>-1049.74        | ABCC3<br>-16.09    | ABCC5<br>1.10   | ABCG2<br>-5.77   | AHR<br>-2.80      | AP1S1<br>-1.88    | APC<br>-17.80    | AR<br>-39194.01 | ARNT<br>-712.26  | ATM<br>-10.01     |
|          | B                   | OKAY             | OKAY                     | OKAY               | OKAY            | OKAY             | OKAY              | OKAY              | OKAY             | A               | A                | OKAY              |
| <b>B</b> | BAX<br>-10.73       | BCL2<br>-16.90   | BCL2L1<br>-8.68          | BLMH<br>-12.84     | BRCA1<br>-3.70  | BRCA2<br>-17.38  | CCND1<br>-6.07    | CCNE1<br>-5.32    | CDK2<br>-2.81    | CDK4<br>-2.58   | CDKN1A<br>-11.61 | CDKN1B<br>-13.50  |
|          | OKAY                | OKAY             | OKAY                     | OKAY               | OKAY            | OKAY             | OKAY              | OKAY              | OKAY             | OKAY            | OKAY             | OKAY              |
| <b>C</b> | CDKN2A<br>362.66    | CDKN2D<br>-17.64 | CLPTM1L<br>-4.16         | CYP1A1<br>-1.39    | CYP1A2<br>-1.47 | CYP2B6<br>-18.17 | CYP2C19<br>-31.04 | CYP2C8<br>4.75    | CYP2C9<br>-18.17 | CYP2D6<br>-2.14 | CYP2E1<br>-1.05  | CYP3A4<br>-137.74 |
|          | A                   | OKAY             | OKAY                     | OKAY               | B               | C                | B                 | A                 | C                | OKAY            | A                | B                 |
| <b>D</b> | CYP3A5<br>2.07      | DHFR<br>-27.37   | EGFR<br>-4.05            | ELK1<br>-3.57      | EPHX1<br>-11.00 | ERBB2<br>-1.46   | ERBB3<br>6.17     | ERBB4<br>-18.17   | ERCC3<br>-9.76   | ESR1<br>-18.17  | ESR2<br>19.92    | FGF2<br>-3952.55  |
|          | A                   | OKAY             | OKAY                     | OKAY               | OKAY            | OKAY             | OKAY              | C                 | OKAY             | OKAY            | A                | OKAY              |
| <b>E</b> | FOS<br>-35994733.47 | GSK3A<br>-3.63   | GSTP1<br>-5.96           | HIF1A<br>-4.55     | IGF1R<br>-18.37 | IGF2R<br>-2.88   | MET<br>-19.18     | MSH2<br>-19.16    | MVP<br>-17.41    | MYC<br>1.10     | NAT2<br>-15.00   | NFKB1<br>-4.68    |
|          | OKAY                | OKAY             | OKAY                     | OKAY               | OKAY            | OKAY             | OKAY              | OKAY              | OKAY             | OKAY            | A                | OKAY              |
| <b>F</b> | NFKB2<br>683.36     | NFKBIB<br>15.74  | NFKBIE<br>-5.80          | PPARA<br>-4.74     | PPARD<br>1.28   | PPARG<br>-8.63   | RARA<br>-4.72     | RARB<br>-17159.69 | RARG<br>1.33     | RB1<br>-12.08   | RELB<br>-8.24    | RXRA<br>-2.58     |
|          | A                   | A                | OKAY                     | OKAY               | OKAY            | OKAY             | OKAY              | A                 | OKAY             | OKAY            | OKAY             | OKAY              |
| <b>G</b> | RXRB<br>145.52      | SOD1<br>6595.14  | SULT1E1<br>-429817058.38 | TNFRSF11A<br>-9.64 | TOP1<br>-3.38   | TOP2A<br>-10.49  | TOP2B<br>-17.45   | TP53<br>-6.75     | TPMT<br>-4.68    | UGCG<br>-4.66   | XPA<br>-45.43    | XPC<br>-110.60    |
|          | A                   | A                | A                        | OKAY               | OKAY            | OKAY             | OKAY              | OKAY              | OKAY             | OKAY            | OKAY             | OKAY              |

**Supplementary Figure S5: Cancer drug resistance mRNA up/down-regulation in H1975 cells compared to A549 cells.** RNA was extracted from H1975 and A549 cells. cDNA was synthesized, which was then added to cancer drug resistance RT<sup>2</sup> Profiler Arrays. H1975 gene expression was compared to A549 gene expression. A heat map was constructed using SABiosciences online software, with fold changes shown below, where ‘A’ refers to genes which amplified late (>30 cycles) in either sample, ‘B’ refers to genes which amplified late (>30 cycles) in both samples, and ‘C’ refers to samples where no expression was detected in either sample. 9 genes were upregulated > 2 fold and 60 genes were downregulated > 2 fold in H1975 cells compared with A549 cells.

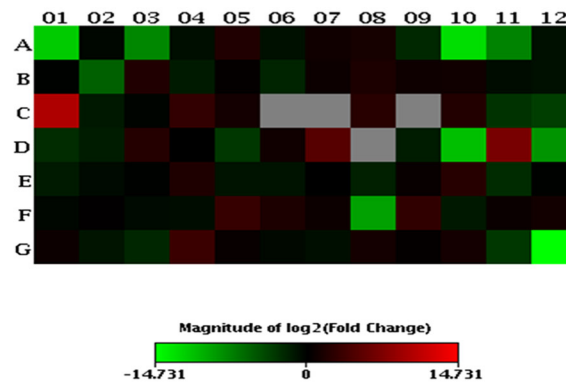

| Layout   | 01            | 02             | 03              | 04            | 05            | 06            | 07            | 08            | 09            | 10            | 11            | 12                |
|----------|---------------|----------------|-----------------|---------------|---------------|---------------|---------------|---------------|---------------|---------------|---------------|-------------------|
| <b>A</b> | ABCB1         | ABCC1          | ABCC2           | ABCC3         | ABCC5         | ABCG2         | AHR           | AP1S1         | APC           | AR            | ARNT          | ATM               |
|          | -3532.55<br>A | -1.28<br>OKAY  | -237.48<br>OKAY | -1.69<br>OKAY | 3.63<br>OKAY  | -1.93<br>OKAY | 1.83<br>OKAY  | 2.47<br>OKAY  | -4.92<br>OKAY | -7231.58<br>A | -197.97<br>A  | -1.85<br>OKAY     |
| <b>B</b> | BAX           | BCL2           | BCL2L1          | BLMH          | BRCA1         | BRCA2         | CCND1         | CCNE1         | CDK2          | CDK4          | CDKN1A        | CDKN1B            |
|          | -1.12<br>OKAY | -45.81<br>OKAY | 3.54<br>OKAY    | -2.94<br>OKAY | 1.20<br>OKAY  | -4.12<br>OKAY | 1.58<br>OKAY  | 3.19<br>OKAY  | 1.69<br>OKAY  | 1.83<br>OKAY  | -1.68<br>OKAY | -1.86<br>OKAY     |
| <b>C</b> | CDKN2A        | CDKN2D         | CLPTM1L         | CYP1A1        | CYP1A2        | CYP2B6        | CYP2C19       | CYP2C8        | CYP2C9        | CYP2D6        | CYP2E1        | CYP3A4            |
|          | 1141.35<br>A  | -2.60<br>OKAY  | -1.19<br>OKAY   | 7.49<br>A     | 2.14<br>B     | -5.77<br>C    | -5.77<br>C    | 5.13<br>A     | -5.77<br>C    | 4.03<br>OKAY  | -7.59<br>OKAY | -11.87<br>B       |
| <b>D</b> | CYP3A5        | DHFR           | EGFR            | ELK1          | EPHX1         | ERBB2         | ERBB3         | ERBB4         | ERCC3         | ESR1          | ESR2          | FGF2              |
|          | -5.97<br>OKAY | -3.05<br>OKAY  | 4.09<br>OKAY    | 1.00<br>OKAY  | -9.00<br>OKAY | 1.96<br>OKAY  | 32.54<br>A    | -5.77<br>C    | -3.06<br>OKAY | -2221.47<br>A | 119.11<br>A   | -417.78<br>OKAY   |
| <b>E</b> | FOS           | GSK3A          | GSTP1           | HIF1A         | IGF1R         | IGF2R         | MET           | MSH2          | MVP           | MYC           | NAT2          | NFKB1             |
|          | -2.92<br>OKAY | -1.45<br>OKAY  | -1.09<br>OKAY   | 3.44<br>OKAY  | -2.06<br>OKAY | -2.12<br>OKAY | -1.02<br>OKAY | -3.70<br>OKAY | 1.37<br>OKAY  | 4.42<br>OKAY  | -5.44<br>OKAY | -1.05<br>OKAY     |
| <b>F</b> | NFKB2         | NFKBIB         | NFKBIE          | PPARA         | PPARD         | PPARG         | RARA          | RARB          | RARG          | RB1           | RELB          | RXRA              |
|          | -1.27<br>OKAY | 1.05<br>OKAY   | -1.49<br>OKAY   | -1.65<br>OKAY | 8.64<br>OKAY  | 3.08<br>OKAY  | 1.65<br>OKAY  | -680.38<br>A  | 6.73<br>OKAY  | -2.69<br>OKAY | 1.54<br>OKAY  | 2.04<br>OKAY      |
| <b>G</b> | RXRB          | SOD1           | SULT1E1         | TNFRSF11A     | TOP1          | TOP2A         | TOP2B         | TP53          | TPMT          | UGCG          | XPA           | XPC               |
|          | 1.63<br>OKAY  | -2.22<br>OKAY  | -4.43<br>B      | 10.62<br>A    | 1.35<br>OKAY  | -1.33<br>OKAY | -1.74<br>OKAY | 2.16<br>OKAY  | 1.19<br>OKAY  | 2.31<br>OKAY  | -8.74<br>OKAY | -27186.46<br>OKAY |

**Supplementary Figure S6: Cancer drug resistance mRNA up/down-regulation in H1975 cells compared to H460 cells.** RNA was extracted from H1975 and H460 cells. cDNA was synthesized, which was then added to cancer drug resistance RT<sup>2</sup> Profiler Arrays. H1975 gene expression was compared to H460 gene expression. A heat map was constructed using SABiosciences online software, with fold changes shown below, where ‘A’ refers to genes which amplified late (>30 cycles) in either sample, ‘B’ refers to genes which amplified late (>30 cycles) in both samples, and ‘C’ refers to samples where no expression was detected in either sample. 20 genes were upregulated >2 fold and 26 genes were downregulated in H1975 cells compared with H460 cells.

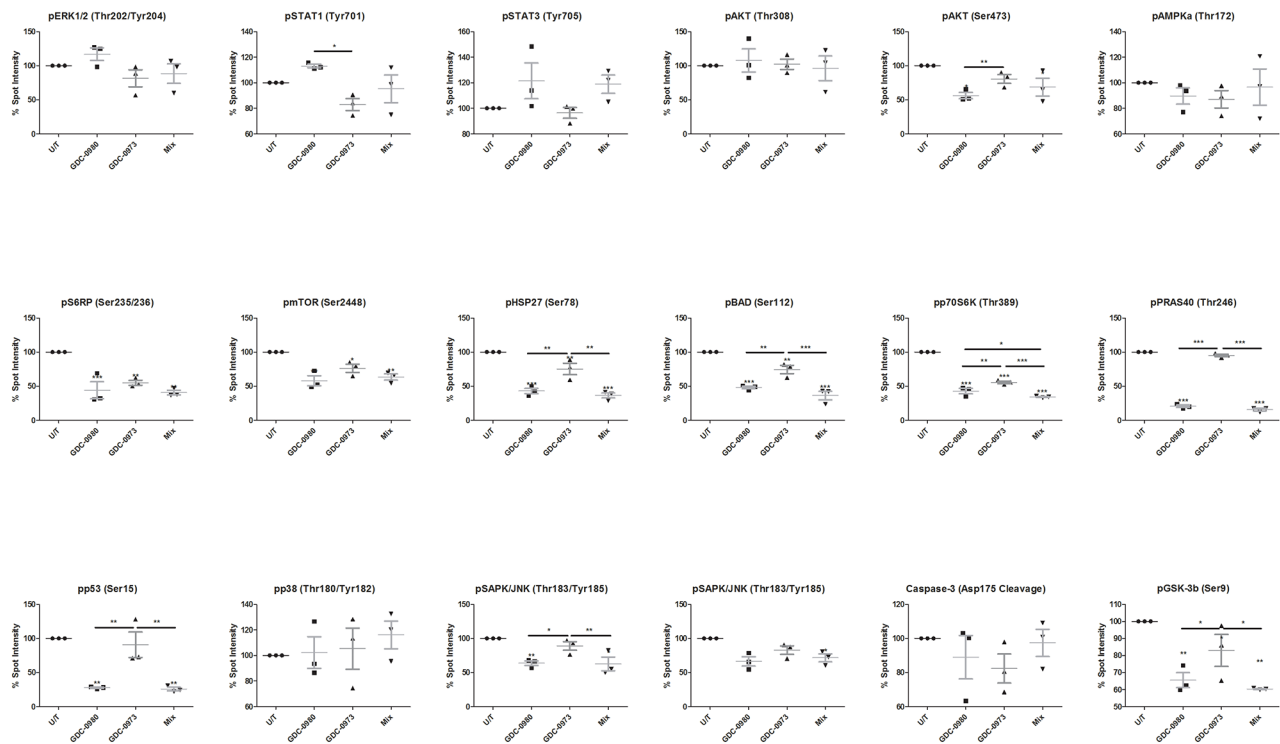

**Supplementary Figure S7: Effect of GDC-0980 and/or GDC-0973 treatment on phosphoprotein expression in H460 cells.** Protein was isolated from H460 cells untreated (4hrs) and treated with GDC-0980 (1 $\mu$ M, 4hrs), GDC-0973 (1 $\mu$ M, 4hrs) and a 1:1 mix of the 2 drugs using Cell Signalling lysis buffer. Phosphoprotein expression was explored using PathScan arrays (duplicate spots, n=3). Spot intensity was quantified through ImageJ software and data were expressed as relative mean  $\pm$  SEM.

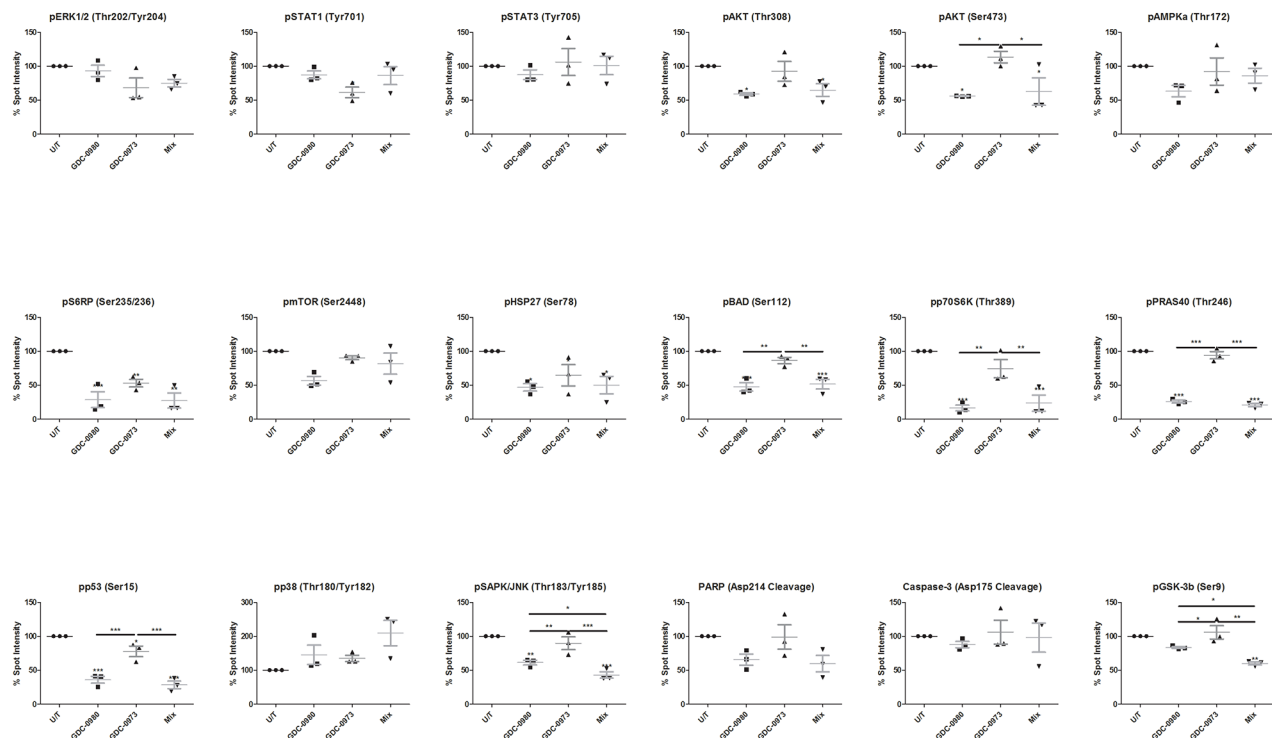

**Supplementary Figure S8: Effect of GDC-0980 and/or GDC-0973 treatment on phosphoprotein expression in A549 cells.** Protein was isolated from A549 cells untreated (4hrs) and treated with GDC-0980 (1 $\mu$ M, 4hrs), GDC-0973 (1 $\mu$ M, 4hrs) and a 1:1 mix of the 2 drugs using Cell Signalling lysis buffer. Phosphoprotein expression was explored using PathScan arrays (duplicate spots, n=3). Spot intensity was quantified through ImageJ software and data were expressed as relative mean  $\pm$  SEM.



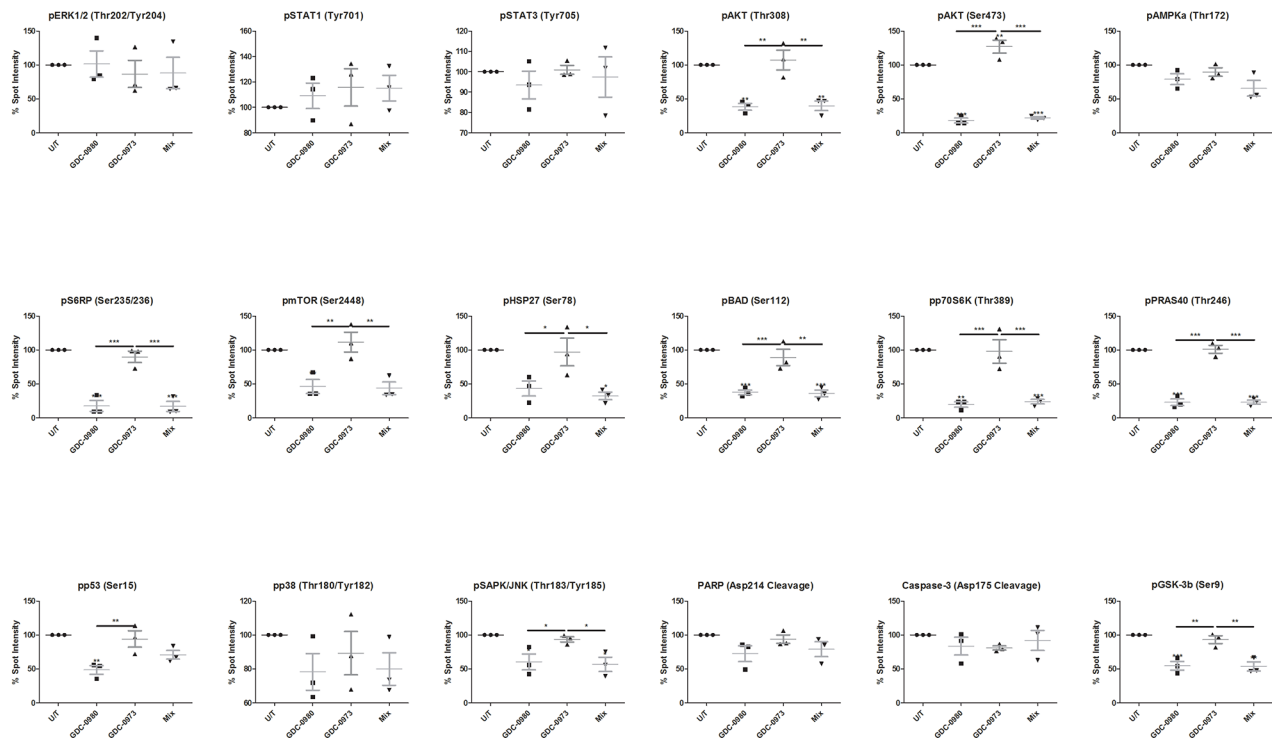

**Supplementary Figure S9: Effect of GDC-0980 and/or GDC-0973 treatment on phosphoprotein expression in H1975 cells.** Protein was isolated from H1975 cells untreated (4hrs) and treated with GDC-0980 (1 μM, 4hrs), GDC-0973 (1 μM, 4hrs) and a 1:1 mix of the 2 drugs using Cell Signalling lysis buffer. Phosphoprotein expression was explored using PathScan arrays (duplicate spots, n=3). Spot intensity was quantified through ImageJ software and data were expressed as relative mean ± SEM.

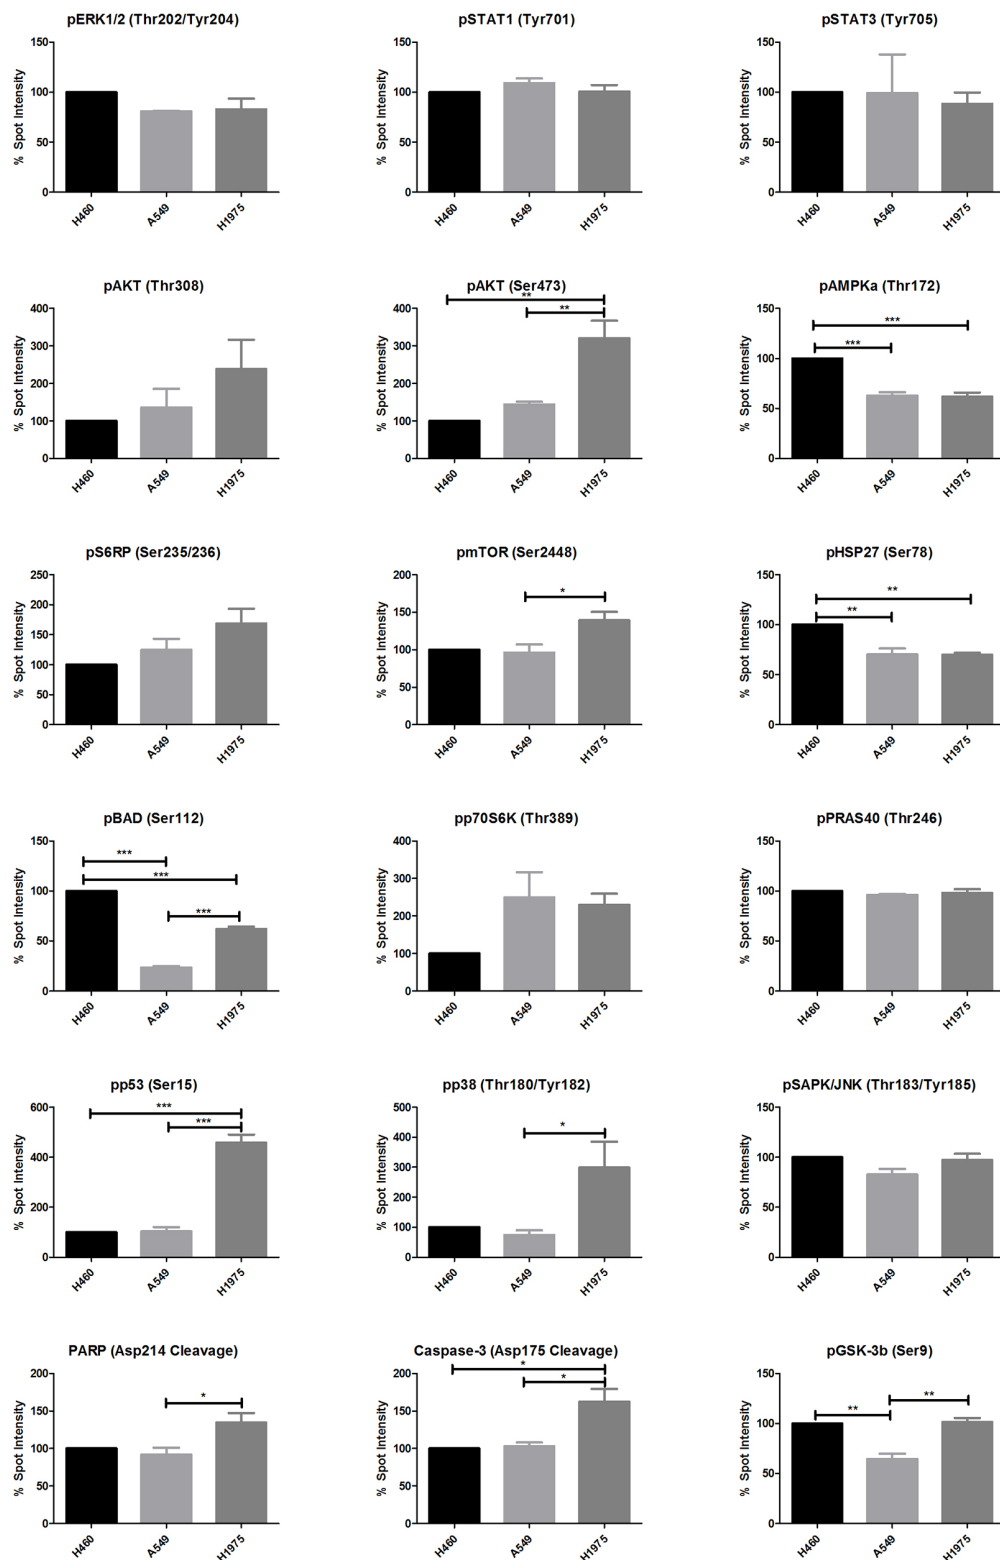

**Supplementary Figure S10: Baseline phosphoprotein expression in H460, A549 and H1975 cells.** Protein was isolated from H460, A549 and H1975 cells (untreated) using Cell Signalling lysis buffer. Phosphoprotein expression was explored using PathScan arrays (duplicate spots, n=3). Spot intensity was quantified through ImageJ software and data were expressed as relative mean  $\pm$  SEM. \*/\*\*/\*\*: p<0.05/0.01/0.001 respectively, from one way ANOVA with Tukey test.

**Supplementary Table S1: Fluidigm gene panel 13-gene. 175 Irish NSCLC tumour samples were profiled by Fluidigm Technology, using an allele-specific test covering 13 genes (150 mutations).**

**See Supplementary File 1**
